# Supplementary material for: Structural Phase Transitions and Thermal Degradation Process of MAPbCl3 Single Crystals Studied by Raman and Brillouin Scattering
Source: MDPI journal article supplement (doi:10.3390/ma15228151), 2022-11-17
Supplement: s1 [file s1]

# Supplementary Materials

Structural Phase Transitions and Thermal Degradation Process of MAPbCl<sub>3</sub> Single Crystals  
Studied by Raman and Brillouin Scattering

Furqanul Hassan Naqvi, Jae-Hyeon Ko

School of Nano Convergence Technology, Nano Convergence Technology Center, Hallym  
University, Chuncheon, Gangwondo 24252, Republic of Korea

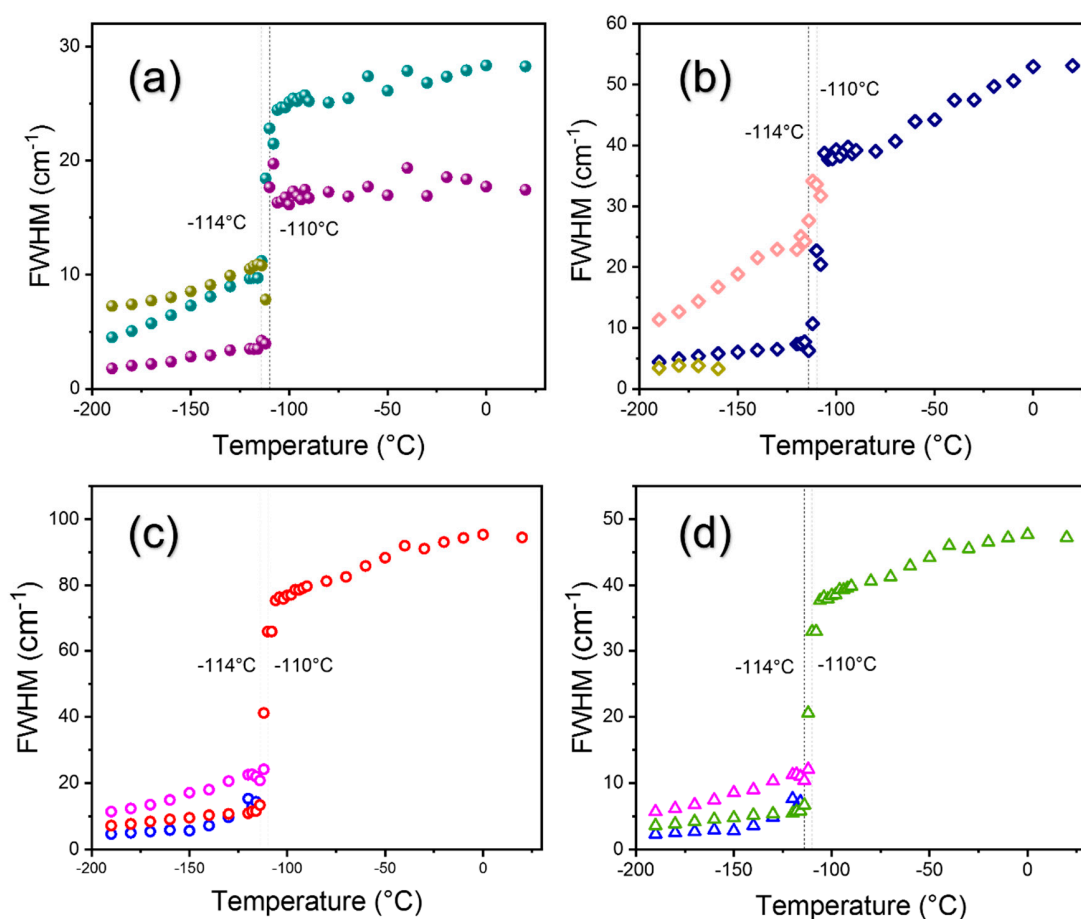

Figure S1: Temperature dependences of the full width at half maximum (FWHM) in 10-300 cm<sup>-1</sup> frequency range (a-d). Phase boundaries are shown as vertical dotted lines along with the phase transition temperatures

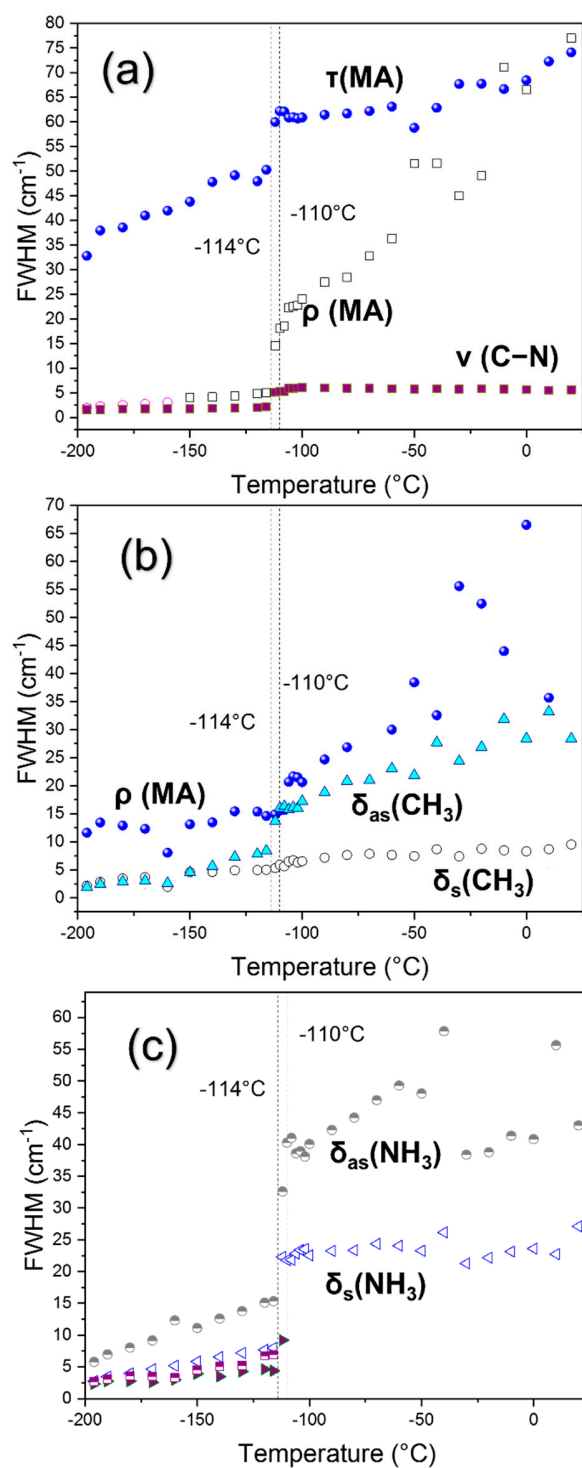

Figure S2: Temperature dependences of the full width at half maximum (FWHM) in  $400\text{-}1700\text{ cm}^{-1}$  frequency range (a-c). Phase boundaries are shown as vertical dotted lines along with the phase transition temperatures.

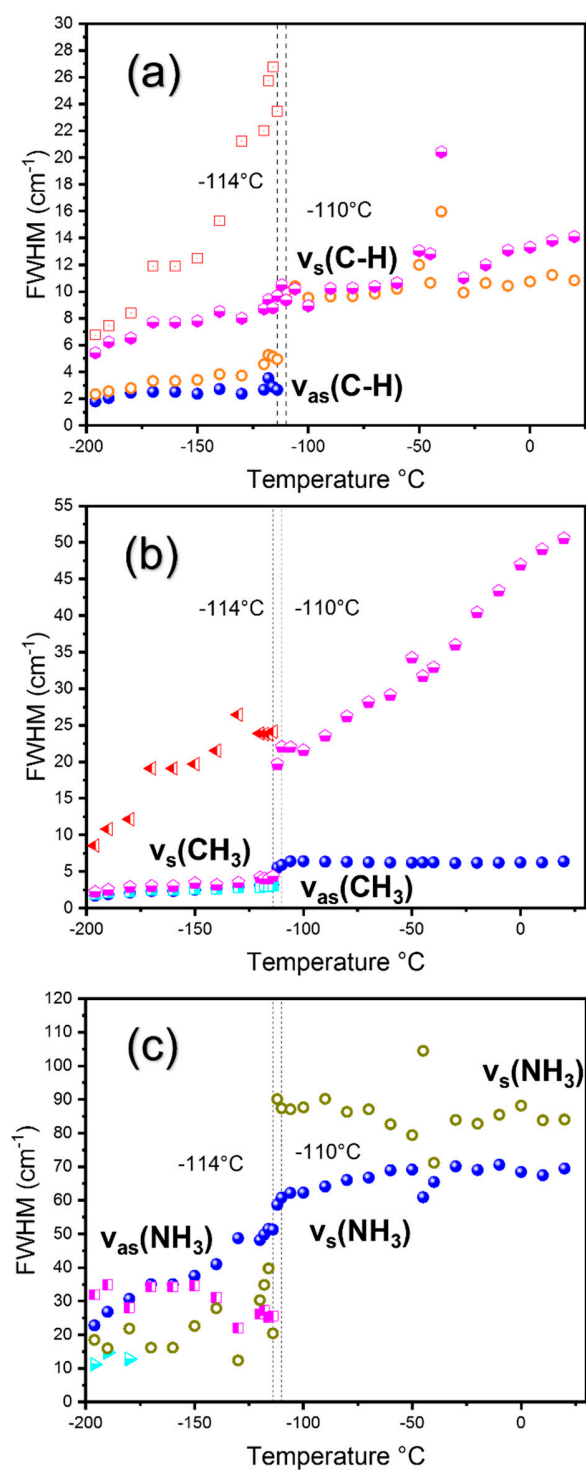

Figure S3: Temperature dependences of the full width at half maximum (FWHM) in 2700-3400  $\text{cm}^{-1}$  frequency range (a-c). Phase boundaries are shown as vertical dotted lines along with the phase transition temperatures.

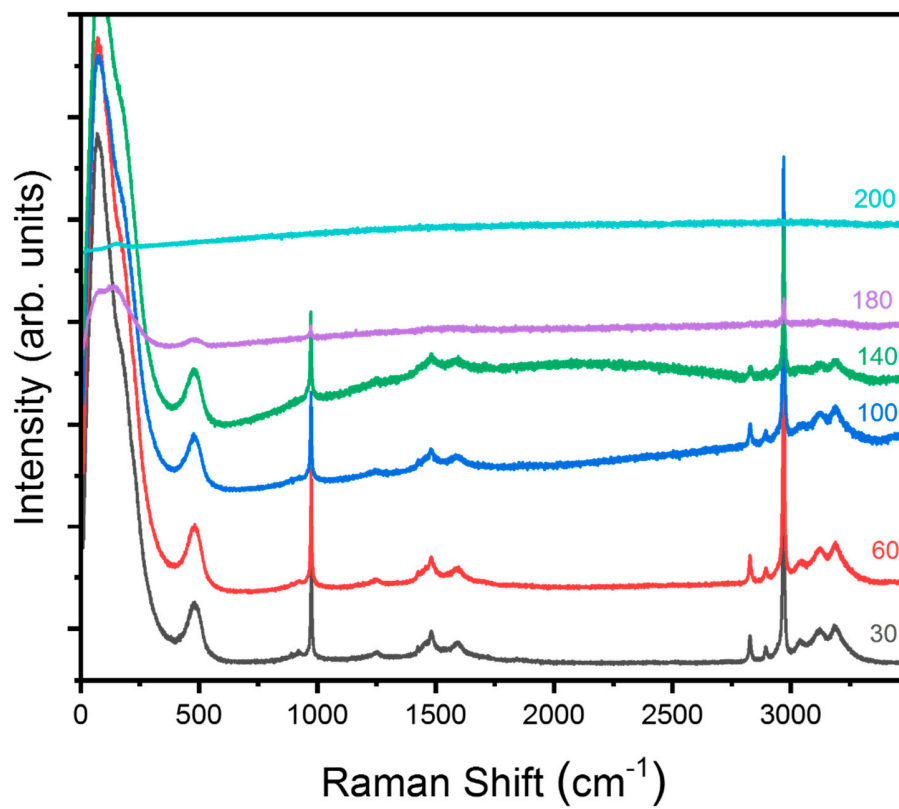

Figure S4: Raman spectra of MAPbCl<sub>3</sub> in a wide frequency range of 10-3500 cm<sup>-1</sup> recorded in the temperature range from room temperature (RT) to 200°C.

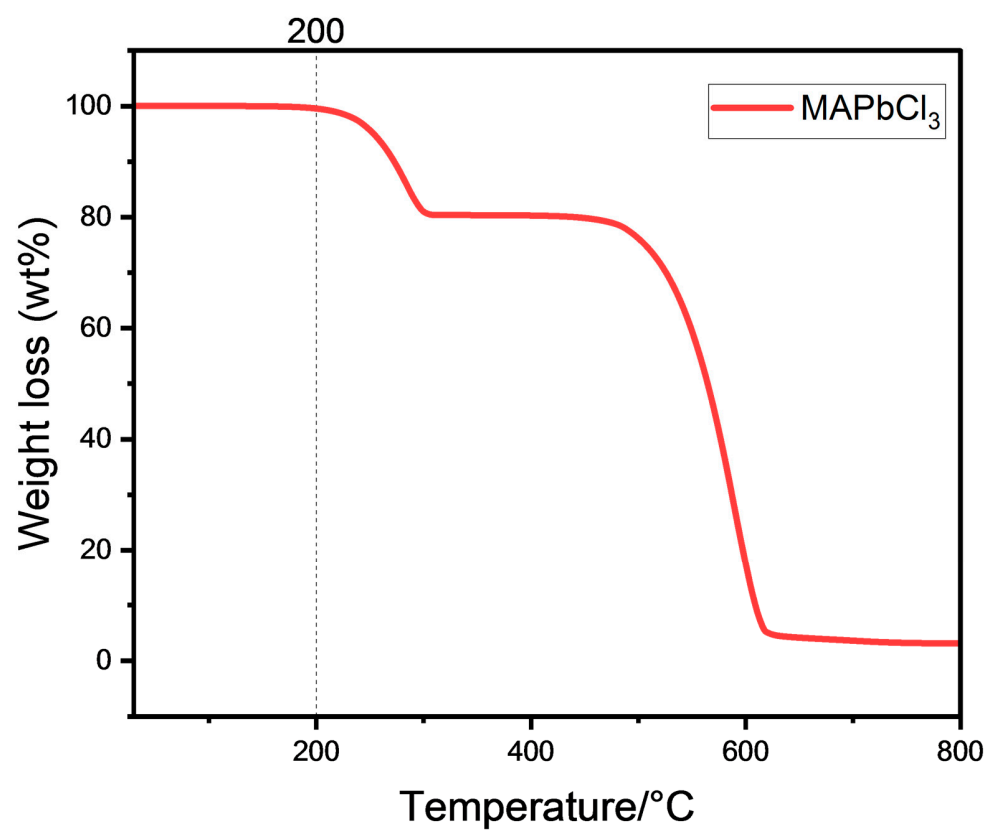

Figure S5. Thermogravimetric analysis curve for synthesized MAPbCl<sub>3</sub> crystal.

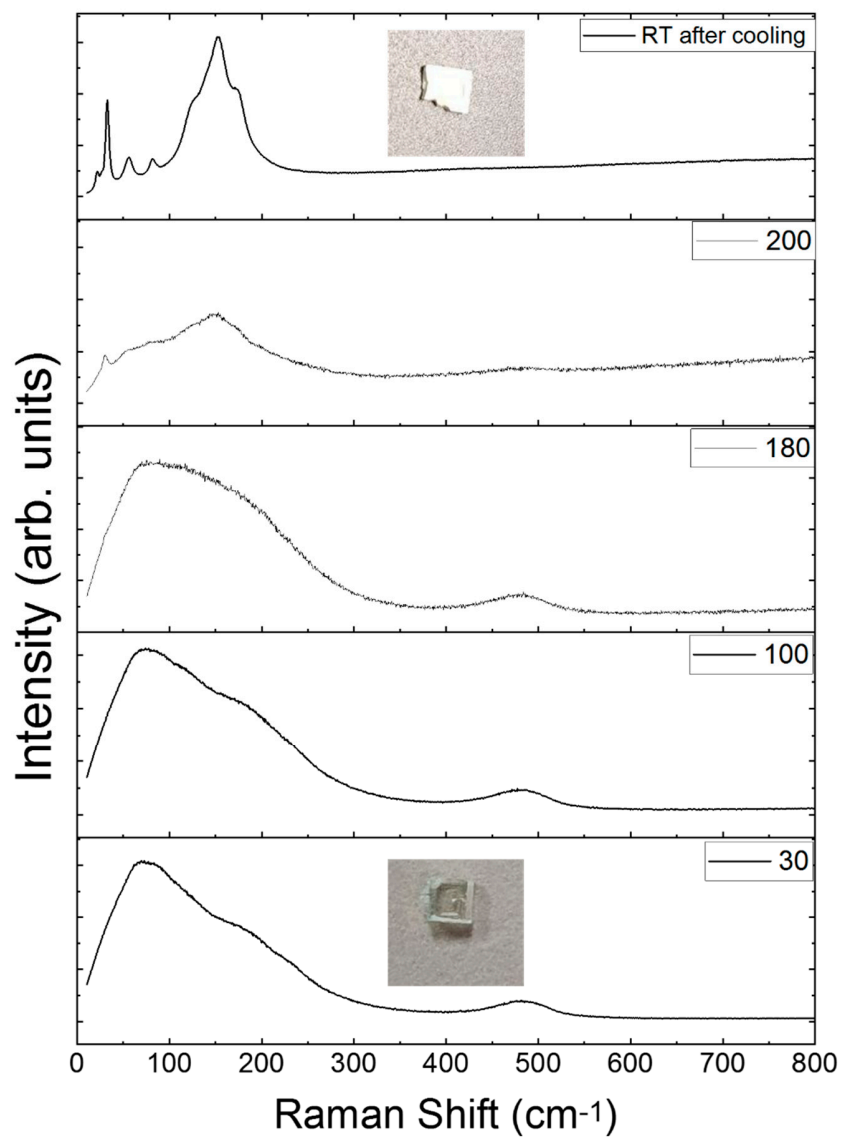

Figure S6: Raman spectra of MAPbCl<sub>3</sub> presented in a limited frequency range of 10-800 cm<sup>-1</sup> from room temperature (RT) to 200°C. Inset figures show the single crystal before (lower figure) and after (upper figure) the degradation.

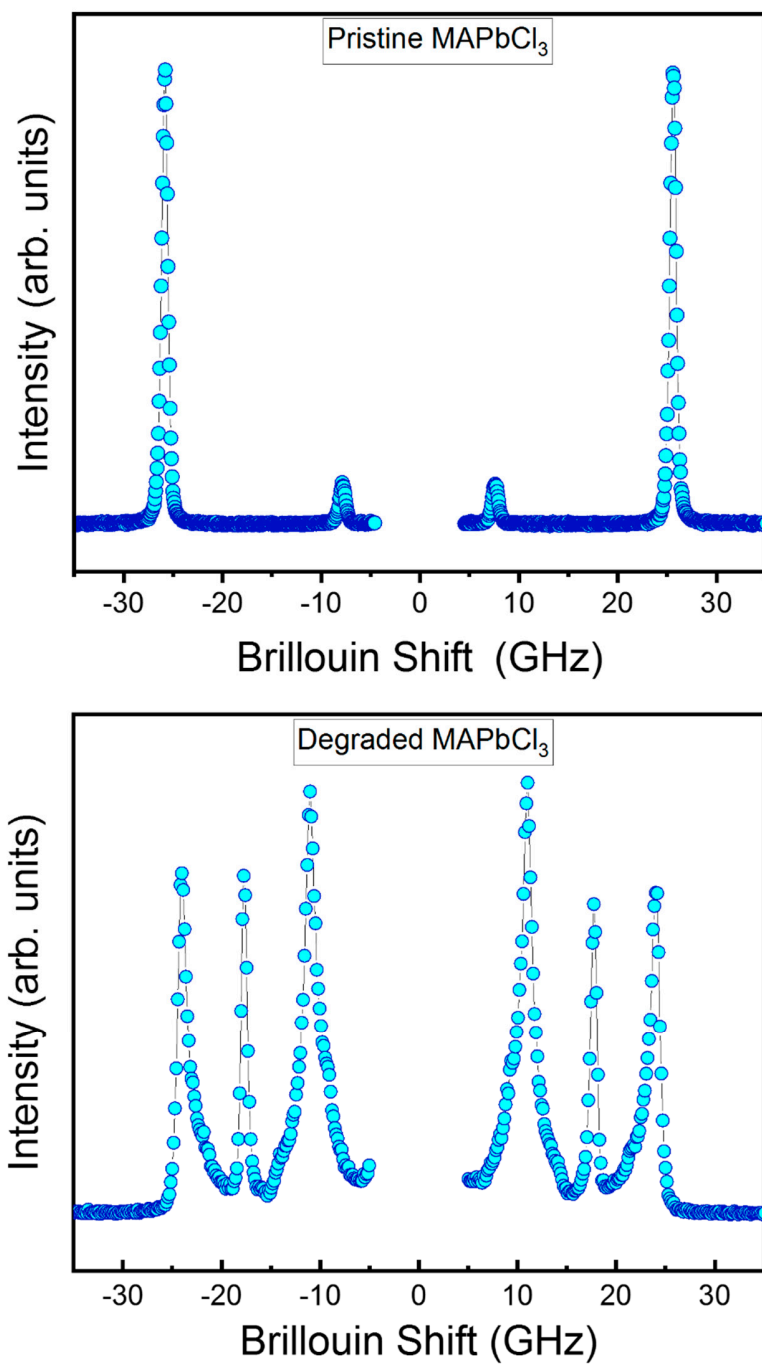

Figure S7: Comparison of Brillouin spectra of the pristine MAPbCl<sub>3</sub> single crystal (a) with the crystal kept for one month in the ambient condition (b)
